# Supplementary material for: Host Species and Geography Differentiate Honeybee Gut Bacterial Communities by Changing the Relative Contribution of Community Assembly Processes
Source: PubMed Central journal article supplement (PMC8262996; doi:10.1128/mbio.00751-21), 2021-06-01
Supplement: mbio.00751-21-sf002.pdf [file mbio.00751-21-sf002.pdf]

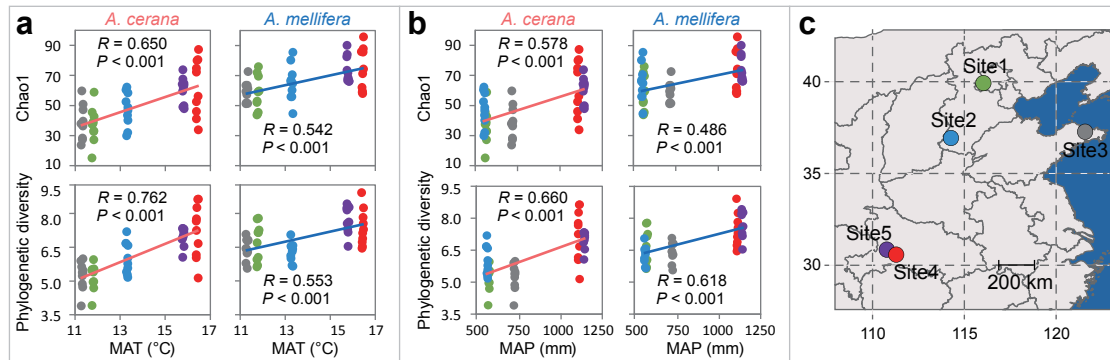

**Fig. S2** Chao1 richness and phylogenetic diversity of *A. cerana* and *A. mellifera* gut bacterial communities positively correlated with mean annual temperature (MAT) and mean annual precipitation (MAP). **a**, Positive correlations between diversity indices and MAT. **b**, Positive correlations between diversity indices and MAP. **c**, The sampling sites.
