# Supplementary material for: Host Species and Geography Differentiate Honeybee Gut Bacterial Communities by Changing the Relative Contribution of Community Assembly Processes
Source: PubMed Central journal article supplement (PMC8262996; doi:10.1128/mbio.00751-21), 2021-06-01
Supplement: mbio.00751-21-sf003.pdf [file mbio.00751-21-sf003.pdf]

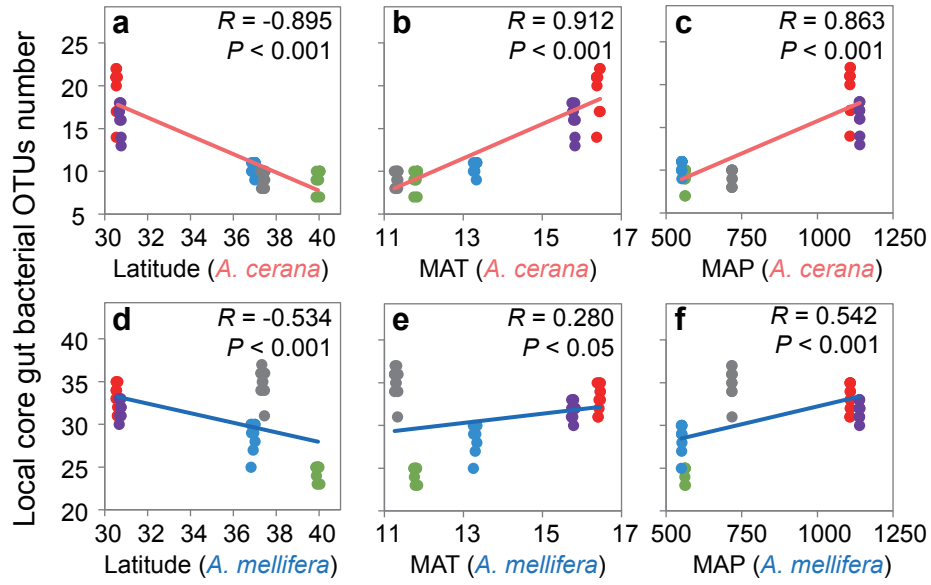

**Fig. S3** Local core gut bacterial species (OTUs at 97% identity) number significantly correlates with latitude, mean annual temperature (MAT), and mean annual precipitation (MAP) for both *A. cerana* and *A. mellifera*. a-c, *A. cerana*. d-f, *A. mellifera*.
