# Supplementary material for: Host Species and Geography Differentiate Honeybee Gut Bacterial Communities by Changing the Relative Contribution of Community Assembly Processes
Source: PubMed Central journal article supplement (PMC8262996; doi:10.1128/mbio.00751-21), 2021-06-01
Supplement: mbio.00751-21-sf005.pdf [file mbio.00751-21-sf005.pdf]

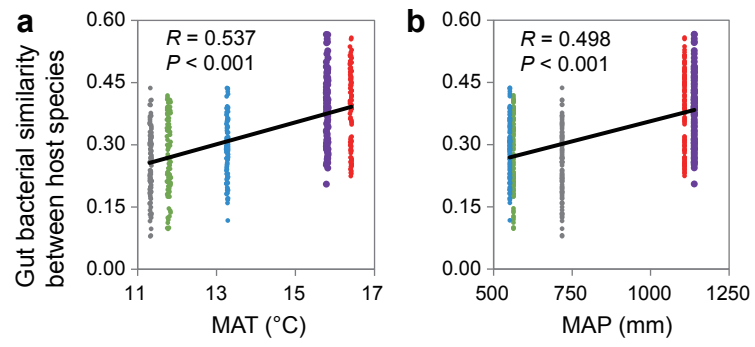

**Fig. S5 Community similarity between *A. cerana* and *A. mellifera* gut microbiota positively correlated with mean annual temperature (MAT) and mean annual precipitation (MAP). a, Positive correlation with MAT. b, Positive correlation with MAP.**
