# Supplementary material for: Host Species and Geography Differentiate Honeybee Gut Bacterial Communities by Changing the Relative Contribution of Community Assembly Processes
Source: PubMed Central journal article supplement (PMC8262996; doi:10.1128/mbio.00751-21), 2021-06-01
Supplement: mbio.00751-21-sf007.pdf [file mbio.00751-21-sf007.pdf]

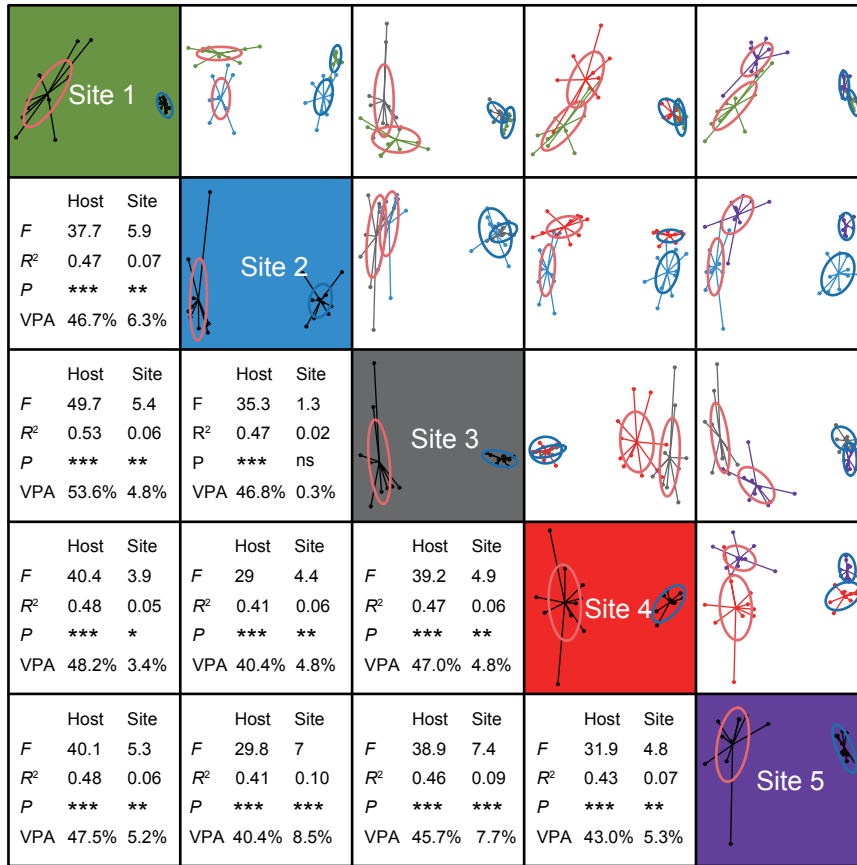

**Fig. S7** Pairwise comparison illustrates that host species dominates over geographical site in governing honeybee gut bacterial communities by the analyses of non-metric multidimensional scaling (NMDS), permutational multivariate analysis of variance (PERMANOVA), and variance partition analysis (VPA). \*\*\*:  $P < 0.001$ ; \*\*:  $P < 0.01$ ; \*:  $P < 0.05$ ; ns:  $P > 0.05$ .  $P$  values were adjusted with BH (Benjamini & Hochberg) method (1).

1. Benjamini Y, Hochberg Y. 1995. Controlling the false discovery rate: a practical and powerful approach to multiple testing. *J R Stat. Soc Ser B-Stat. Methodol* **57**:289-300. <http://www.jstor.org/stable/2346101>
